# Supplementary material for: Impact of the COVID-19 Pandemic Surveillance of Visceral Leishmaniasis in Brazil: An Ecological Study
Source: MDPI journal article supplement (doi:10.3390/idr16010009), 2024-02-09
Supplement: s1 [file s1]

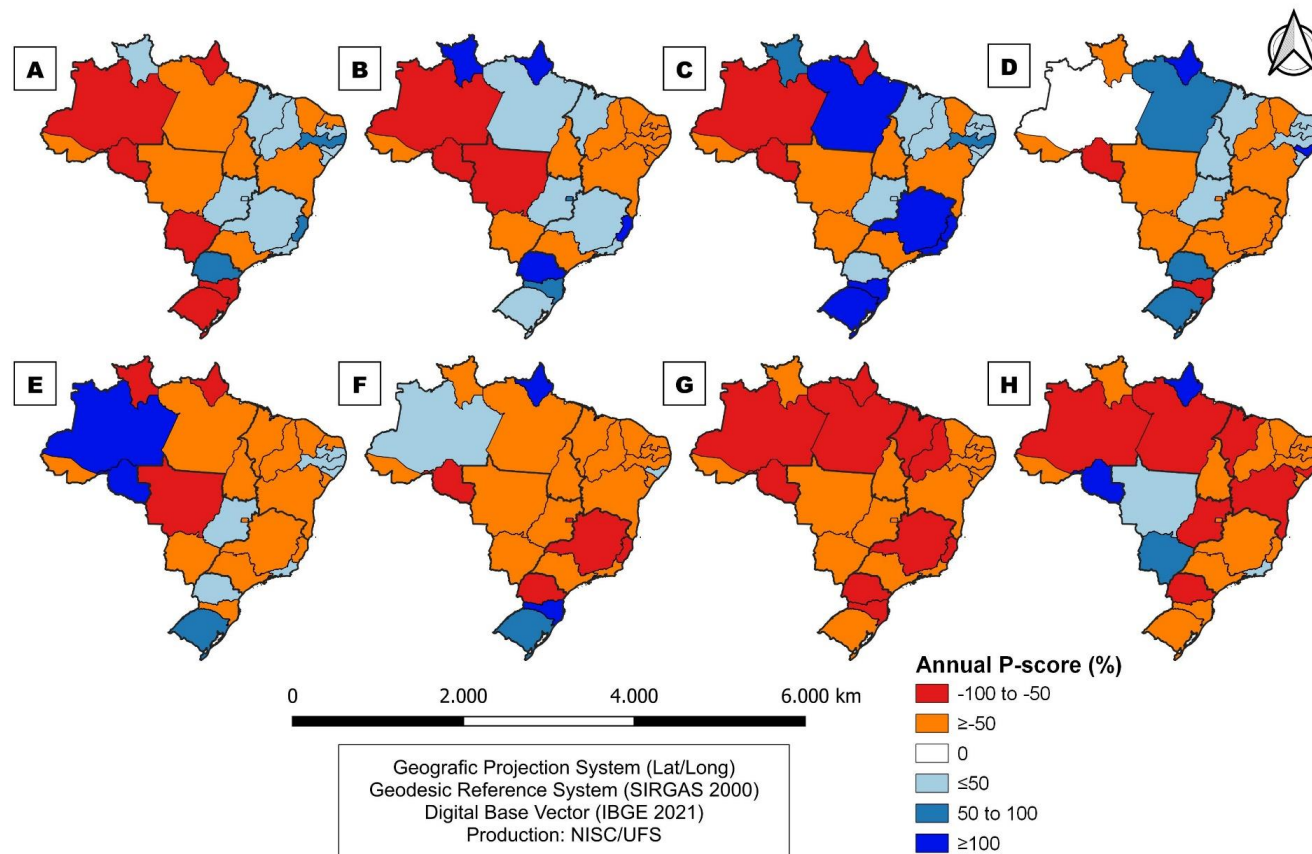

**Figure S1.** Spatial distribution of annual P-score of VL new cases notification. A) 2015. B) 2016. C) 2017. D) 2018. E) 2019. F) 2020. G) 2021. H) 2022.

**Commented [SC1]:** We changed to Figure S1 and Figure S2, please confirm.

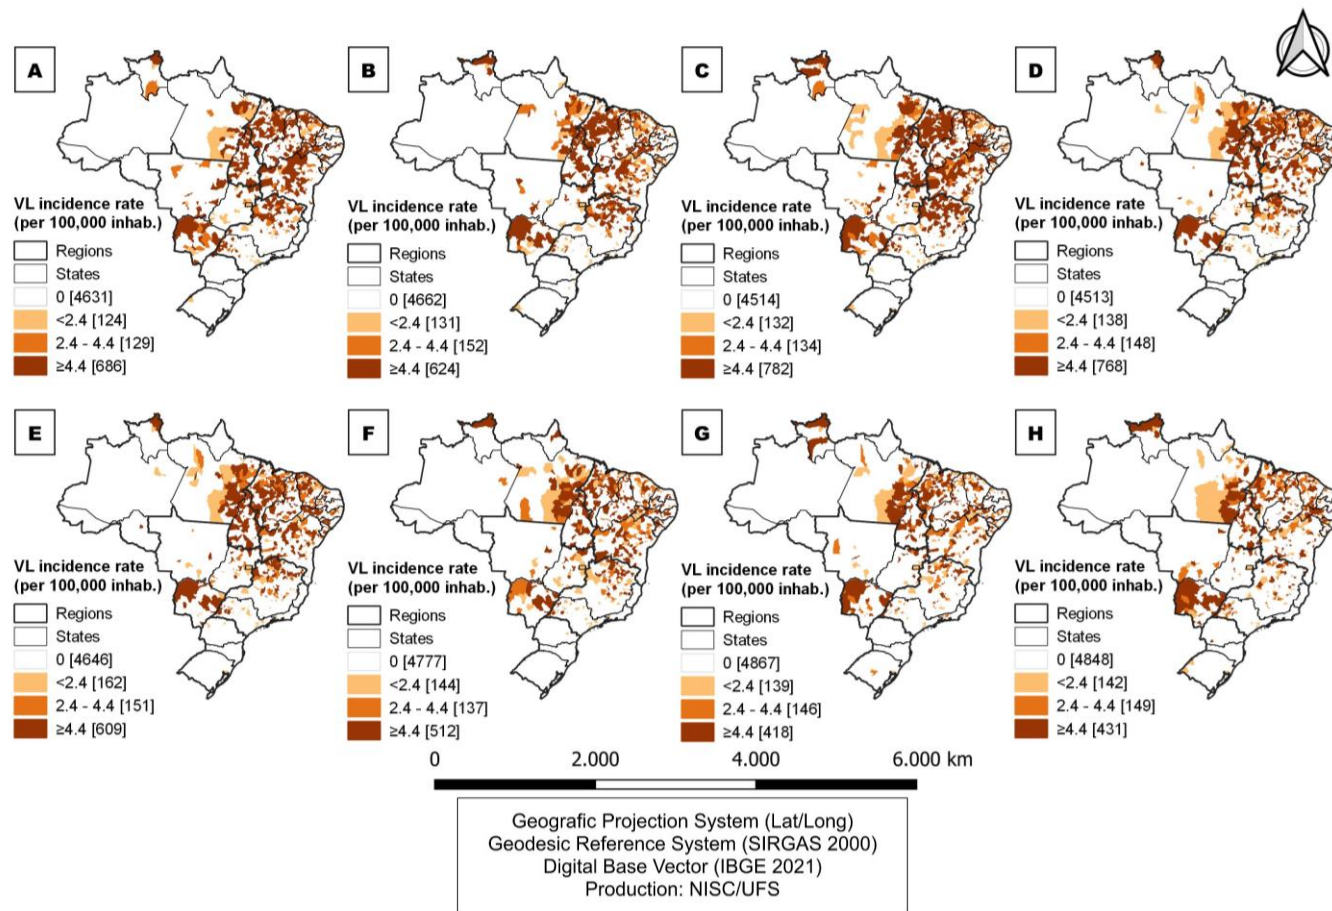

**Figure S2.** Spatial distribution of annual VL incidence. **A)** 2015. **B)** 2016. **C)** 2017. **D)** 2018. **E)** 2019. **F)** 2020. **G)** 2021. **H)** 2022.
